# Supplementary material
Source: PubMed Central journal article supplement (PMC5623868)

# Source Data for Figure 1B

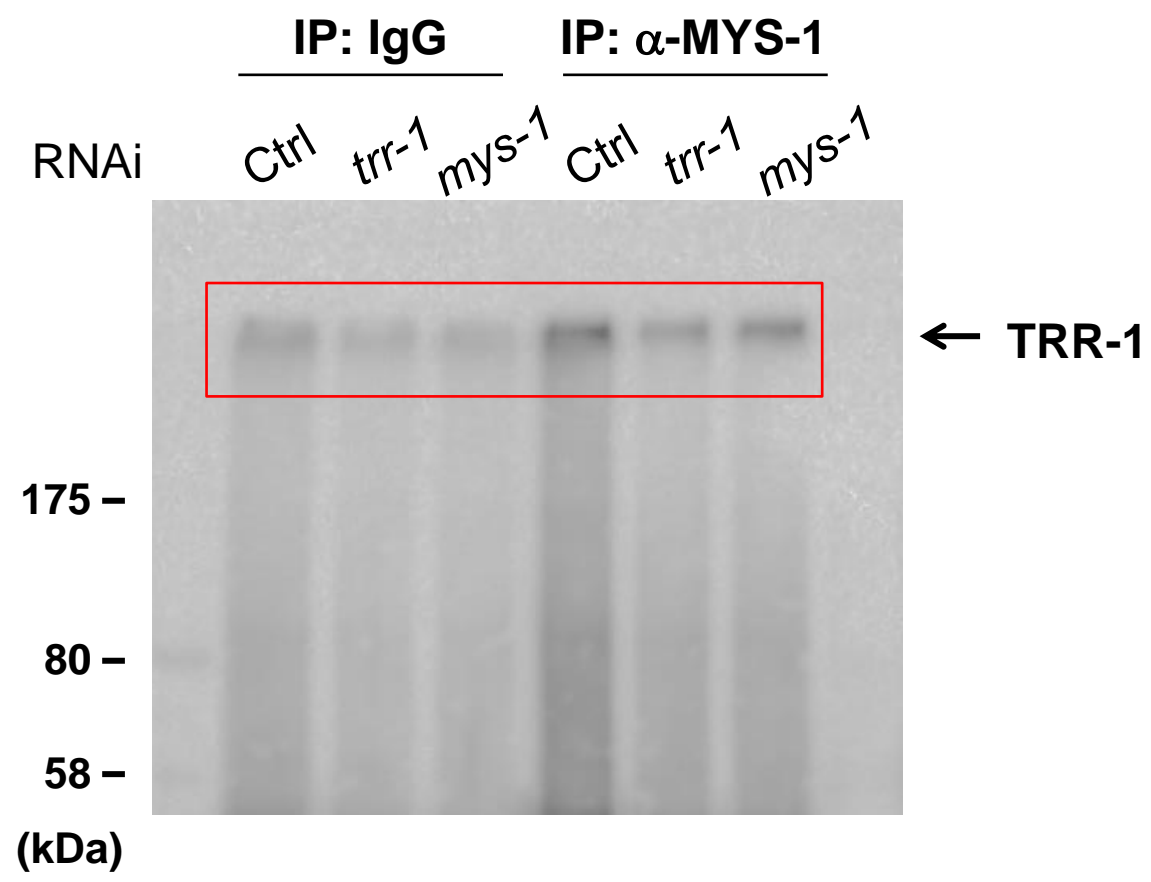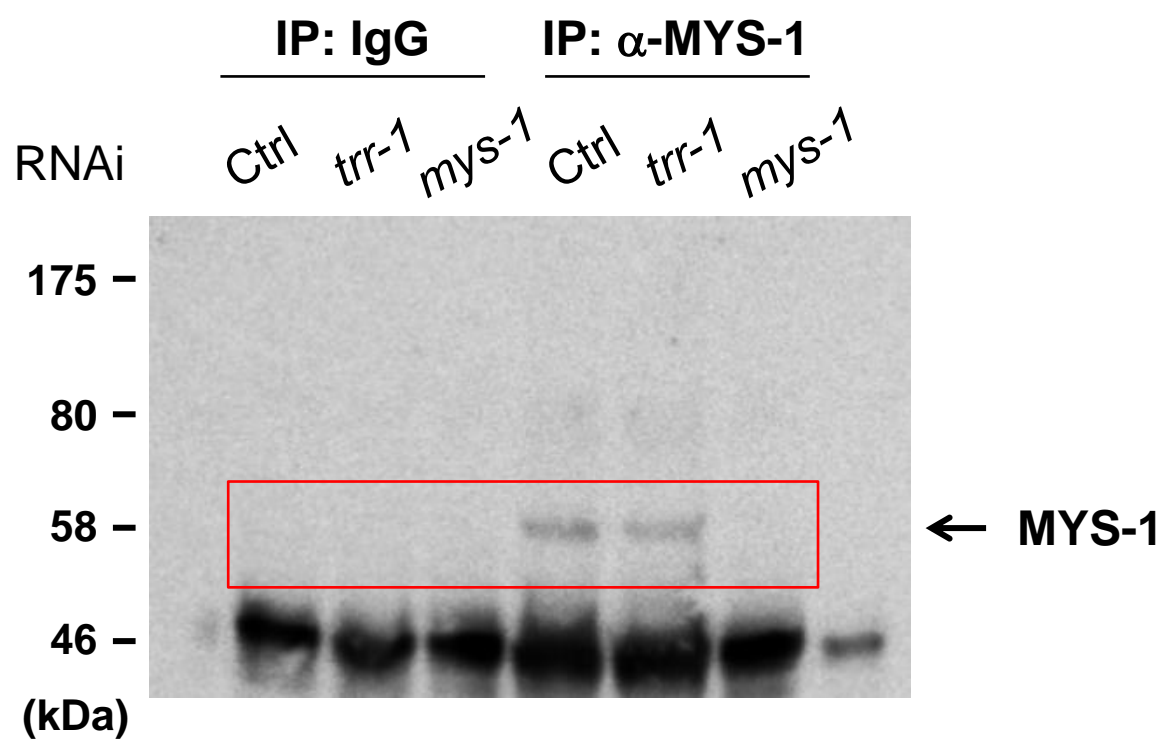

Supplement: EMBR-18-0-s003.pdf [file EMBR-18-0-s003.pdf]
